# Supplementary material for: Unraveling the Mind's Blueprint Early Maladaptive Schemas as Crystal Balls for Preoperative Anxiety
Source: Research Square preprint supplement (doi:10.21203/rs.3.rs-6941702/v1), 2025-08-07
Supplement: Supplementary file 1 [file ac145bdcd2eb9418d6dd2e72.xlsx]

## Sheet: Sheet1
AGE	SEX	I am worried about the anesthetic	The anesthetic is on my mind continually	I would like to know as much as possible about the anesthetic	I am worried about the procedure	The procedure is on my mind continuallY	I would like to know as much as possible about the procedure	Column2	Column1	Column4	Column3	Column6	Column5	Column65	Column8	Column9	Column20	Column22	Column21	Column24	Column23	Column26	Column25	Column261	Column28	Column29	Column10	Column12	Column11	Column14	Column13	Column16	Column15	Column161	Column18	Column19	Column40	Column42	Column41	Column44	Column43	Column46	Column45	Column461	Column48	Column49	Column30	Column32	Column31
22	FEMALE	Not at all	Not at all	Not at all	Not at all	Not at all	Not at all	4	4	4	4	3	3	4	4	4	4	4	4	4	4	4	4	4	4	4	4	4	4	4	4	4	4	4	4	4	4	4	4	4	6	4	4	4	3	4	3	3	3
36	FEMALE	Slightly	Slightly	Moderately	Not at all	Moderately	Moderately	1	1	4	1	3	2	2	2	1	2	2	2	2	2	2	2	5	4	4	4	2	2	2	2	2	4	2	4	1	2	2	2	2	2	2	2	2	2	2	2	2	1
40	FEMALE	Slightly	Slightly	Slightly	Moderately	Moderately	Moderately	1	3	6	6	6	5	5	5	5	5	4	4	4	4	4	6	4	4	4	4	1	1	1	5	4	3		3	5	5	3	3	3	4	6	5	4	3	6	4	3	3
25	FEMALE	Not at all	Not at all	Not at all	Not at all	Not at all	Not at all	2	2	2	2	2	2	2	2	2	2	2	2	2	2	2	2	2	1	2	2	2	1	2	2	2	4	1	1	1	1	4	1	2	2	1	1	2	1	2	2	2	2
39	MALE	Slightly	Slightly	Moderately	Not at all	Extremely	Not at all	4	5	4	4	1	4	3	1	4	3	1	6	1	3	1	2	4	5	4	3	5	2	1	4	6	3	3	3	5	2	2	6	4	3	3	4	3	6	4	3	6	2
33	FEMALE	Extremely	Slightly	Moderately	Moderately	Moderately	Moderately	4	4	1	6	3	3	5	4	3	3	5	6	6	3	6	6	4	3	6	1	1	2	1	2	4	1	6	1	3	3	6	4	6	3	6	3	6	5	3	3	5	4
23	FEMALE	Slightly	Not at all	Moderately	Slightly	Extremely	Moderately	6	3	6	5	4	4	4	6	1	6	5	5	3	5	4	5	5	6	6	6	4	4	4	1	4	4	4	4	1	1	4	4	3	3	3	5	5	3	4	5	3	1
20	FEMALE	Not at all	Not at all	Not at all	Not at all	Extremely	Not at all	5	5	4	5	5	5	5	5	5	5	6	3	5	5	5	5	5	5	5	5	4	5	2	5	5	6	2	6	6	2	2	2	5	4	5	5	5	4	5	2	5	2
19	MALE	Slightly	Slightly	Moderately	Moderately	Slightly	Slightly	2	6	2	4	2	2	2	1	4	4	2	3	2	2	2	2	4	4	4	4	2	2	2	2	4	2	2	4	4	2	2	2	2	2	2	6	5	1	1	2	2	2
27	FEMALE	Slightly	Not at all	Moderately	Slightly	Moderately	Slightly	4	6	6	5	6	5	5	5	5	6	6	4	4	4	4	5	6	5	6	6	3	3	3	5	5	5	6	5	5	5	5	4	3	4	6	6	5	6	4	3	4	4
33	FEMALE	Moderately	Moderately	Extremely	Moderately	Moderately	Moderately	2	2	2	2	2	2	1	4	2	1	1	2	2	2	2	4	4	1	2	1	1	1	2	2	2	2	2	4	4	4	4	2	2	2	2	1	1	1	2	4	2	2
25	MALE	Not at all	Not at all	Slightly	Not at all	Extremely	Slightly	1	1	2	3	2	2	5	5	3	5	6	3	5	6	3	4	1	6	6	6	5	5	5	5	3	2	2	2	2	2	2	4	2	2	2	3	3	2	2	2	2	1
24	FEMALE	Not at all	Slightly	Moderately	Slightly	Moderately	Slightly	4	4	4	1	1	2	2	2	1	1	4	5	3	6	3	1	3	1	4	1	1	4	1	4	1	4	4	4	4	2	2	2	2	2	2	1	6	3	1	5	2	5
25	FEMALE	Extremely	Moderately	Extremely	Moderately	Slightly	Moderately	2	2	2	1	2	1	1	1	2	2	3	1	2	1	4	1	1	2	2	1	2	2	2	2	2	2	2	1	2	2	1	2	1	1	1	1	1	2	2	1	2	3
36	FEMALE	Slightly	Not at all	Not at all	Not at all	Moderately	Not at all	1	6	5	3	6	3	1	5	1	2	2	2	2	2	2	1	3	1	1	1	1	4	1	1	1	1	5	1	2	2	4	2	4	2	1	2	2	2	2	4	2	4
33	FEMALE	Slightly	Slightly	Slightly	Slightly	Not at all	Not at all	4	4	3	6	1	1	1	1	4	2	4	4	2	6	1	4	3	1	3	4	1	2	2	2	2	1	2	4	4	1	1	1	4	1	4	3	2	4	2	4	6	4
28	FEMALE	Not at all	Not at all	Not at all	Not at all	Moderately	Not at all	1	2	2	4	2	4	2	2	2	2	4	2	2	4	4	4	4	6	4	5	5	5	3	4	6	6	1	3	3	4	1	2	4	2	3	5	3	3	5	6	3	1
20	FEMALE	Not at all	Not at all	Not at all	Not at all	Extremely	Not at all	2	2	2	2	2	2	1	2	2	2	2	2	2	2	1	2	2	2	2	2	2	2	2	2	2	2	4	1	1	1	1	1	1	3	1	1	1	1	1	1	1	1
39	FEMALE	Moderately	Not at all	Moderately	Not at all	Slightly	Not at all	4	3	4	3	6	1	1	4	4	1	4	1	4	3	3	3	6	1	1	4	2	2	3	2	1	3	4	4	1	4	1	1	4	4	3	4	3	3	4	4	3	3
30	FEMALE	Not at all	Slightly	Not at all	Not at all	Extremely	Not at all	3	3	6	6	3	6	1	1	3	4	1	4	3	3	3	3	4	3	4	3	6	6	6	6	3	6	4	3	3	3	4	2	4	1	1	3	1	1	1	6	6	6
22	FEMALE	Not at all	Not at all	Not at all	Slightly	Not at all	Slightly	1	3	6	3	1	3	2	2	3	6	1	2	6	6	6	3	3	3	6	5	6	6	4	5	3	6	6	3	6	6	2	4	6	6	6	2	2	6	2	2	4	3
36	MALE	Slightly	Slightly	Slightly	Slightly	Slightly	Slightly	6	6	5	4	6	2	2	6	2	5	1	5	6	4	1	6	3	6	6	3	3	5	2	6	6	5	1	4	4	1	2	2	4	2	2	3	4	2	2	2	2	3
40	FEMALE	Not at all	Not at all	Not at all	Not at all	Moderately	Not at all	2	2	2	1	1	5	5	5	1	1	2	2	2	2	2	2	2	2	2	1	2	2	1	2	1	2	2	1	1	1	1	2	2	2	5	2	2	2	2	2	2	2
25	FEMALE	Moderately	Moderately	Extremely	Slightly	Slightly	Not at all	1	1	1	1	1	1	4	1	1	2	2	2	2	2	2	2	1	2	2	2	2	2	2	1	2	1	2	2	1	2	2	2	2	1	1	2	1	2	2	1	1	1
39	FEMALE	Slightly	Not at all	Moderately	Not at all	Extremely	Not at all	2	3	3	3	3	6	4	3	4	4	6	6	5	6	6	6	6	4	4	3	6	2	2	1	1	1	1	1	1	1	1	2	2	2	2	2	1	1	1	5	1	2
33	MALE	Not at all	Not at all	Not at all	Not at all	Not at all	Not at all	2	2	2	2	4	2	1	2	3	2	1	1	1	2	1	2	1	2	2	2	2	4	2	1	4	1	2	2	1	1	2	2	2	2	2	2	4	4	4	2	1	2
23	MALE	Not at all	Not at all	Not at all	Not at all	Not at all	Not at all	1	3	5	3	5	2	2	5	5	5	2	4	4	4	2	5	3	3	4	6	4	4	2	3	6	6	1	3	1	1	2	2	2	4	2	5	5	6	3	3	2	2
20	FEMALE	Not at all	Not at all	Not at all	Not at all	Not at all	Extremely	2	2	2	2	2	4	5	5	1	5	4	5	5	1	1	6	2	2	2	4	4	2	2	2	2	2	2	2	2	3	2	2	2	2	2	3	2	2	2	2	5	5
19	MALE	Not at all	Not at all	Not at all	Not at all	Not at all	Not at all	1	1	4	1	1	2	2	1	2	1	1	2	2	1	2	1	2	2	2	2	2	2	2	2	2	2	2	2	1	2	2	2	1	2	1	2	2	2	2	2	2	6
27	FEMALE	Moderately	Moderately	Not at all	Not at all	Not at all	Not at all	6	6	6	3	5	2	2	4	4	5	1	2	3	6	6	3	3	6	1	1	2	6	5	5	6	1	3	4	4	1	3	2	1	1	1	5	5	2	6	2	2	2
33	FEMALE	Slightly	Not at all	Moderately	Slightly	Moderately	Slightly	3	4	1	4	3	6	4	3	1	3	3	3	3	6	4	3	3	6	1	4	4	4	3	3	6	1	3	1	3	4	1	3	4	3	3	3	4	4	4	3	1	3
25	FEMALE	Not at all	Not at all	Not at all	Not at all	Extremely	Not at all	4	4	4	1	4	1	4	1	4	4	4	1	4	4	4	1	4	1	4	1	1	1	4	4	4	4	1	4	4	4	4	4	1	1	1	1	4	1	1	4	1	1
24	FEMALE	Not at all	Not at all	Not at all	Not at all	Extremely	Slightly	3	6	4	3	3	3	4	3	3	3	3	3	3	3	3	3	3	3	3	3	4	3	3	4	3	3	3	3	3	4	3	3	3	3	3	3	3	3	3	6	3	6
29	MALE	Not at all	Not at all	Not at all	Not at all	Not at all	Not at all	4	4	6	4	1	6	3	4	1	3	4	4	1	2	3	2	1	4	6	3	3	4	1	4	6	4	3	1	2	3	3	1	4	3	4	4	4	6	1	3	4	4
33	FEMALE	Not at all	Not at all	Not at all	Not at all	Extremely	Not at all	1	4	3	1	4	3	1	4	3	1	5	3	1	3	4	4	3	1	3	4	4	3	3	1	4	4	4	1	1	3	3	3	1	1	4	4	4	4	4	3	3	3
31	MALE	Not at all	Not at all	Not at all	Not at all	Not at all	Not at all	3	4	6	5	5	1	2	2	2	2	2	2	2	6	3	3	3	1	1	3	3	3	4	4	6	3	4	4	3	2	3	1	4	3	6	6	6	2	2	2	2	1
25	FEMALE	Moderately	Moderately	Not at all	Moderately	Not at all	Not at all	2	2	4	2	2	1	1	1	1	1	1	1	1	1	2	2	1	4	4	1	2	1	2	1	1	1	1	4	1	4	1	6	1	1	1	3	4	2	1	2	4	3
30	FEMALE	Slightly	Slightly	Moderately	Slightly	Slightly	Slightly	5	5	3	3	5	3	6	5	1	1	5	6	1	5	3	1	2	1	1	1	3	6	1	1	1	1	1	1	1	4	3	1	3	4	1	1	1	1	4	1	1	1
39	FEMALE	Slightly	Not at all	Not at all	Extremely	Moderately	Not at all	4	4	1	4	3	1	6	5	3	5	4	3	4	1	3	1	6	1	3	4	6	4	6	4	6	1	6	4	3	4	6	3	6	3	1	6	3	6	3	1	3	4
36	FEMALE	Slightly	Not at all	Slightly	Not at all	Slightly	Not at all	6	6	6	6	6	6	5	3	6	6	5	3	3	6	6	3	5	3	6	6	6	5	3	6	3	5	3	6	6	4	4	3	4	6	3	3	6	4	4	4	4	4
40	FEMALE	Not at all	Not at all	Not at all	Not at all	Not at all	Not at all	3	4	3	4	3	4	4	3	4	4	4	4	3	3	3	4	4	4	4	4	3	3	3	3	3	3	3	3	4	4	4	4	4	4	4	4	3	3	1	4	4	4
25	FEMALE	Moderately	Extremely	Not at all	Moderately	Slightly	Moderately	1	4	1	6	4	2	1	4	3	3	4	4	4	4	1	6	4	4	6	4	2	2	1	4	1	1	1	1	1	1	1	1	1	1	1	4	4	3	4	3	3	3
39	MALE	Not at all	Not at all	Not at all	Not at all	Extremely	Not at all	6	6	6	1	6	3	6	4	6	5	1	3	4	3	3	4	4	3	3	3	3	3	6	4	5	4	6	6	6	3	4	3	4	4	6	6	4	4	3	6	3	4
33	FEMALE	Not at all	Slightly	Not at all	Not at all	Extremely	Extremely	1	1	1	1	1	4	1	4	4	3	4	4	3	4	4	4	3	4	4	4	4	4	4	1	4	4	4	3	4	4	4	3	4	1	4	4	4	3	3	4	4	4
23	MALE	Moderately	Slightly	Slightly	Slightly	Slightly	Slightly	4	5	5	5	3	5	5	5	5	5	3	5	5	3	1	5	5	5	5	5	5	5	5	5	5	5	5	5	5	5	3	5	3	5	5	5	5	5	2	2	1	5
20	FEMALE	Not at all	Not at all	Not at all	Not at all	Not at all	Not at all	2	1	1	2	4	4	1	4	1	4	1	4	1	2	4	1	4	2	1	1	2	1	4	6	3	1	1	4	1	4	2	1	1	4	2	4	1	3	1	4	1	4
19	FEMALE	Not at all	Not at all	Slightly	Not at all	Moderately	Slightly	4	3	4	4	4	4	4	4	4	4	4	4	4	4	4	4	4	4	3	4	4	4	4	4	4	4	3	2	4	3	6	5	6	4	3	6	1	3	4	1	3	4
27	FEMALE	Moderately	Moderately	Moderately	Moderately	Moderately	Slightly	6	3	3	3	4	1	6	3	4	3	4	3	4	6	4	6	4	1	1	3	3	1	3	3	4	3	4	1	6	1	6	1	4	3	1	3	4	3	4	6	3	3
33	FEMALE	Slightly	Not at all	Slightly	Moderately	Moderately	Not at all	2	4	3	5	5	5	4	3	3	2	4	2	4	4	4	3	6	4	4	5	5	5	3	3	3	5	5	5	5	5	3	5	5	5	5	3	4	2	5	1	2	2
25	FEMALE	Slightly	Not at all	Moderately	Not at all	Moderately	Slightly	3	3	3	3	6	2	6	2	1	1	1	4	4	2	2	1	1	6	1	3	4	4	1	3	1	1	2	1	1	1	1	2	2	2	2	2	2	2	2	2	2	3
24	MALE	Slightly	Slightly	Not at all	Not at all	Extremely	Not at all	2	2	2	2	2	2	2	4	4	1	2	2	2	1	2	2	3	1	2	2	4	1	2	2	1	2	2	2	2	2	1	2	2	4	1	1	2	2	2	1	1	3
25	MALE	Not at all	Not at all	Not at all	Not at all	Not at all	Not at all	4	1	2	1	2	4	4	1	6	2	1	2	1	3	2	6	2	3	2	1	1	1	2	1	2	6	3	5	5	6	6	4	2	2	1	5	5	6	4	4	2	4
36	FEMALE	Not at all	Not at all	Not at all	Not at all	Not at all	Not at all	3	2	1	4	1	3	2	3	3	5	6	6	3	3	1	6	6	3	4	1	6	3	1	3	3	5	6	5	6	5	4	1	2	1	1	3	6	6	6	5	1	1
33	FEMALE	Not at all	Not at all	Slightly	Not at all	Moderately	Slightly	4	4	2	2	2	2	2	2	4	2	5	4	4	4	2	2	2	2	2	2	2	2	2	2	2	2	2	2	2	2	2	5	2	2	2	2	2	2	2	2	2	2
36	MALE	Not at all	Not at all	Not at all	Not at all	Not at all	Not at all	2	5	2	2	5	2	2	2	2	2	2	2	2	2	4	6	2	2	1	1	2	2	2	2	2	2	2	2	4	1	2	2	2	2	3	1	3	6	6	2	2	2
33	FEMALE	Not at all	Not at all	Not at all	Not at all	Extremely	Not at all	4	5	6	3	6	2	3	3	1	1	1	4	3	1	1	5	6	5	6	5	4	1	1	1	2	3	1	6	3	3	1	2	2	1	4	3	2	2	2	6	2	2
28	FEMALE	Not at all	Not at all	Not at all	Not at all	Not at all	Not at all	4	1	2	1	2	4	4	1	6	2	1	2	1	3	2	6	2	3	2	1	1	1	2	1	2	6	3	5	5	6	6	4	2	2	1	5	5	6	4	4	2	4
20	FEMALE	Slightly	Not at all	Slightly	Not at all	Extremely	Not at all	5	6	5	5	6	6	5	5	5	4	3	3	3	3	6	6	3	6	6	6	6	5	5	5	6	6	6	5	6	6	1	4	3	3	6	3	3	1	4	1	3	4
39	MALE	Slightly	Not at all	Not at all	Not at all	Moderately	Not at all	3	3	6	6	6	5	6	3	5	6	4	4	5	5	5	6	3	5	5	5	4	3	5	4	1	6	3	3	4	4	3	1	6	1	3	5	6	3	4	5	3	2
33	FEMALE	Not at all	Not at all	Not at all	Not at all	Not at all	Not at all	6	4	5	3	4	1	1	1	4	1	1	1	1	1	1	1	1	4	1	4	4	4	1	4	1	4	4	4	4	4	1	2	1	1	1	2	2	2	2	2	2	4
19	MALE	Not at all	Not at all	Not at all	Not at all	Not at all	Not at all	6	5	6	6	6	6	3	6	3	6	6	3	6	3	3	1	3	6	6	6	3	3	4	6	3	3	3	6	4	4	3	4	1	4	4	4	6	6	6	6	3	4
20	FEMALE	Not at all	Not at all	Not at all	Not at all	Not at all	Not at all	2	2	2	2	2	1	2	2	1	2	1	3	2	1	1	3	4	1	3	1	1	1	2	2	2	1	1	3	3	1	2	6	4	3	1	3	4	2	1	4	2	2
19	FEMALE	Not at all	Slightly	Slightly	Not at all	Extremely	Not at all	5	5	5	3	4	5	6	5	3	4	2	6	6	6	6	5	5	5	6	5	5	5	6	5	5	5	5	5	6	6	1	1	4	3	4	3	2	2	2	3	3	4
25	FEMALE	Moderately	Not at all	Extremely	Moderately	Slightly	Extremely	6	2	2	2	2	1	2	2	4	2	2	2	2	1	1	2	3	2	2	6	2	2	2	2	2	4	2	4	2	2	2	6	2	1	2	2	2	2	2	2	2	6
24	FEMALE	Not at all	Not at all	Not at all	Not at all	Moderately	Not at all	6	3	5	6	6	4	1	4	3	4	6	5	1	3	3	4	5	6	5	5	6	3	3	3	6	3	6	6	3	3	1	3	3	3	3	5	6	6	3	1	3	3
25	FEMALE	Not at all	Slightly	Extremely	Slightly	Not at all	Extremely	4	4	2	4	1	2	2	2	5	2	5	4	4	6	4	5	5	5	5	5	3	2	2	2	1	2	2	2	2	2	4	4	2	2	2	1	2	2	5	2	2	2
36	FEMALE	Slightly	Not at all	Not at all	Not at all	Not at all	Not at all	1	2	1	1	1	2	2	2	2	2	3	4	2	4	4	2	1	1	1	1	2	2	2	2	2	2	2	2	2	2	2	2	2	1	1	2	2	1	2	2	2	2
33	MALE	Not at all	Slightly	Slightly	Slightly	Not at all	Extremely	5	5	5	5	5	2	5	5	5	2	3	2	1	4	3	5	5	5	1	5	2	1	2	2	3	5	6	6	6	3	6	6	3	6	5	3	3	4	2	1	5	3
28	FEMALE	Not at all	Not at all	Not at all	Not at all	Not at all	Not at all	2	2	4	2	5	5	5	5	5	5	2	5	5	4	5	2	2	2	5	3	4	2	2	2	2	3	3	6	4	2	6	5	5	2	6	6	5	5	5	5	5	6
20	FEMALE	Slightly	Not at all	Slightly	Not at all	Moderately	Not at all	5	5	5	5	5	3	4	3	3	5	6	3	1	5	6	5	5	5	5	5	3	5	6	5	5	5	5	5	5	5	3	1	5	5	5	5	3	4	3	5	2	2
39	FEMALE	Slightly	Not at all	Not at all	Not at all	Moderately	Slightly	5	5	5	5	5	5	5	5	5	5	5	5	5	5	5	5	5	5	5	5	5	5	2	4	5	5	2	2	1	1	1	1	2	2	2	5	5	5	5	5	5	5
25	FEMALE	Moderately	Slightly	Moderately	Slightly	Slightly	Slightly	4	5	4	4	1	4	3	1	4	3	1	6	1	3	1	2	4	5	4	3	5	2	1	4	6	3	3	3	5	2	2	6	4	3	3	4	3	6	4	3	6	2
39	MALE	Extremely	Slightly	Slightly	Moderately	Not at all	Not at all	4	4	1	6	3	3	5	4	3	3	5	6	6	3	6	6	4	3	6	1	1	2	1	2	4	1	6	1	3	3	6	4	6	3	6	3	6	5	3	3	5	4
29	FEMALE	Not at all	Not at all	Not at all	Not at all	Extremely	Slightly	6	3	6	5	4	4	4	6	1	6	5	5	3	5	4	5	5	6	6	6	4	4	4	1	4	4	4	4	1	1	4	4	3	3	3	5	5	3	4	5	3	1
33	FEMALE	Not at all	Not at all	Not at all	Not at all	Extremely	Not at all	5	5	4	5	5	5	5	5	5	5	6	3	5	5	5	5	5	5	5	5	4	5	2	5	5	6	2	6	6	2	2	2	5	4	5	5	5	4	5	2	5	2
31	FEMALE	Not at all	Not at all	Not at all	Not at all	Moderately	Not at all	2	6	2	4	2	2	2	1	4	4	2	3	2	2	2	2	4	4	4	4	2	2	2	2	4	2	2	4	4	2	2	2	2	2	2	6	5	1	1	2	2	2
25	FEMALE	Slightly	Slightly	Not at all	Not at all	Moderately	Not at all	4	6	6	5	6	5	5	5	5	6	6	4	4	4	4	5	6	5	6	6	3	3	3	5	5	5	6	5	5	5	5	4	3	4	6	6	5	6	4	3	4	4
30	FEMALE	Moderately	Not at all	Moderately	Slightly	Slightly	Slightly	2	2	2	2	2	2	1	4	2	1	1	2	2	2	2	4	4	1	2	1	1	1	2	2	2	2	2	4	4	4	4	2	2	2	2	1	1	1	2	4	2	2
39	FEMALE	Moderately	Not at all	Extremely	Not at all	Not at all	Not at all	1	1	2	3	2	2	5	5	3	5	6	3	5	6	3	4	1	6	6	6	5	5	5	5	3	2	2	2	2	2	2	4	2	2	2	3	3	2	2	2	2	1
36	FEMALE	Slightly	Slightly	Not at all	Moderately	Moderately	Extremely	4	4	4	1	1	2	2	2	1	1	4	5	3	6	3	1	3	1	4	1	1	4	1	4	1	4	4	4	4	2	2	2	2	2	2	1	6	3	1	5	2	5
40	MALE	Not at all	Not at all	Not at all	Not at all	Extremely	Not at all	2	2	2	1	2	1	1	1	2	2	3	1	2	1	4	1	1	2	2	1	2	2	2	2	2	2	2	1	2	2	1	2	1	1	1	1	1	2	2	1	2	3
25	FEMALE	Not at all	Not at all	Not at all	Not at all	Not at all	Slightly	1	6	5	3	6	3	1	5	1	2	2	2	2	2	2	1	3	1	1	1	1	4	1	1	1	1	5	1	2	2	4	2	4	2	1	2	2	2	2	4	2	4
39	FEMALE	Slightly	Not at all	Not at all	Not at all	Extremely	Not at all	4	4	3	6	1	1	1	1	4	2	4	4	2	6	1	4	3	1	3	4	1	2	2	2	2	1	2	4	4	1	1	1	4	1	4	3	2	4	2	4	6	4
33	FEMALE	Not at all	Not at all	Slightly	Slightly	Moderately	Not at all	1	2	2	4	2	4	2	2	2	2	4	2	2	4	4	4	4	6	4	5	5	5	3	4	6	6	1	3	3	4	1	2	4	2	3	5	3	3	5	6	3	1
23	FEMALE	Not at all	Not at all	Slightly	Slightly	Not at all	Slightly	2	2	2	2	2	2	1	2	2	2	2	2	2	2	1	2	2	2	2	2	2	2	2	2	2	2	4	1	1	1	1	1	1	3	1	1	1	1	1	1	1	1
20	MALE	Not at all	Not at all	Not at all	Not at all	Extremely	Not at all	4	3	4	3	6	1	1	4	4	1	4	1	4	3	3	3	6	1	1	4	2	2	3	2	1	3	4	4	1	4	1	1	4	4	3	4	3	3	4	4	3	3
19	FEMALE	Not at all	Not at all	Not at all	Not at all	Not at all	Not at all	1	2	2	2	2	2	2	2	2	2	4	3	2	3	3	2	4	1	2	2	2	2	2	2	2	2	2	2	2	2	2	2	2	2	2	5	5	5	2	2	2	2
27	FEMALE	Moderately	Not at all	Slightly	Not at all	Not at all	Not at all	3	1	5	5	2	1	2	5	3	5	1	6	1	3	4	5	3	6	3	4	5	5	5	5	6	5	4	5	5	6	3	1	2	3	5	3	4	1	2	2	3	3
33	FEMALE	Slightly	Not at all	Not at all	Not at all	Not at all	Not at all	6	5	5	5	6	3	1	4	6	6	4	5	2	6	3	5	5	6	5	5	6	6	3	5	6	5	5	5	5	5	5	1	3	3	5	5	6	6	5	6	2	2
25	FEMALE	Not at all	Slightly	Slightly	Not at all	Not at all	Not at all	2	2	2	2	2	2	2	2	2	2	2	2	2	2	2	2	2	2	2	2	2	2	2	2	2	2	2	1	2	2	2	2	2	2	2	2	2	2	2	2	2	2
24	MALE	Extremely	Slightly	Extremely	Moderately	Slightly	Not at all	1	3	1	1	1	1	2	2	6	3	1	6	6	5	5	6	6	6	5	5	3	3	6	5	6	5	6	5	6	5	4	4	6	3	5	6	5	4	1	5	3	2
25	MALE	Not at all	Slightly	Moderately	Slightly	Not at all	Not at all	3	4	3	3	4	6	3	3	3	6	3	4	6	3	5	3	2	3	1	3	5	5	5	6	3	1	1	1	4	4	2	4	2	6	4	3	6	5	6	6	3	2
36	MALE	Not at all	Not at all	Not at all	Not at all	Not at all	Not at all	6	3	3	3	3	2	2	4	2	5	2	5	5	5	3	2	5	3	5	5	2	2	2	3	2	2	4	2	2	4	4	2	5	2	2	5	4	2	2	5	2	3
33	FEMALE	Not at all	Not at all	Not at all	Not at all	Not at all	Not at all	6	6	5	3	3	4	4	3	2	4	3	4	4	4	4	4	4	3	6	4	1	1	5	5	3	6	3	3	3	1	6	3	3	4	4	3	6	5	3	6	4	1
36	FEMALE	Not at all	Not at all	Not at all	Slightly	Not at all	Not at all	2	2	2	2	2	2	2	2	2	2	2	2	2	2	2	2	2	2	2	2	2	2	2	2	2	2	2	2	2	2	2	2	2	2	2	2	2	2	2	2	2	2
33	FEMALE	Not at all	Not at all	Extremely	Extremely	Slightly	Not at all	6	3	5	5	1	2	2	4	2	4	3	6	4	1	6	2	1	4	3	6	1	2	2	4	2	2	2	1	3	1	2	1	2	2	2	5	5	2	2	6	2	2
25	FEMALE	Slightly	Not at all	Moderately	Slightly	Not at all	Moderately	3	3	6	6	3	6	1	1	3	4	1	4	3	3	3	3	4	3	4	3	6	6	6	6	3	6	4	3	3	3	4	2	4	1	1	3	1	1	1	6	6	6
39	FEMALE	Not at all	Moderately	Moderately	Not at all	Not at all	Not at all	1	3	6	3	1	3	2	2	3	6	1	2	6	6	6	3	3	3	6	5	6	6	4	5	3	6	6	3	6	6	2	4	6	6	6	2	2	6	2	2	4	3
33	MALE	Not at all	Not at all	Slightly	Not at all	Extremely	Slightly	6	6	5	4	6	2	2	6	2	5	1	5	6	4	1	6	3	6	6	3	3	5	2	6	6	5	1	4	4	1	2	2	4	2	2	3	4	2	2	2	2	3
23	FEMALE	Slightly	Not at all	Not at all	Not at all	Not at all	Not at all	2	2	2	1	1	5	5	5	1	1	2	2	2	2	2	2	2	2	2	1	2	2	1	2	1	2	2	1	1	1	1	2	2	2	5	2	2	2	2	2	2	2
20	FEMALE	Slightly	Slightly	Moderately	Not at all	Slightly	Not at all	1	1	1	1	1	1	4	1	1	2	2	2	2	2	2	2	1	2	2	2	2	2	2	1	2	1	2	2	1	2	2	2	2	1	1	2	1	2	2	1	1	1
19	FEMALE	Slightly	Slightly	Slightly	Slightly	Slightly	Slightly	2	3	3	3	3	6	4	3	4	4	6	6	5	6	6	6	6	4	4	3	6	2	2	1	1	1	1	1	1	1	1	2	2	2	2	2	1	1	1	5	1	2
27	FEMALE	Not at all	Not at all	Not at all	Not at all	Not at all	Not at all	2	2	2	2	4	2	1	2	3	2	1	1	1	2	1	2	1	2	2	2	2	4	2	1	4	1	2	2	1	1	2	2	2	2	2	2	4	4	4	2	1	2
33	MALE	Slightly	Not at all	Not at all	Not at all	Moderately	Slightly	1	3	5	3	5	2	2	5	5	5	2	4	4	4	2	5	3	3	4	6	4	4	2	3	6	6	1	3	1	1	2	2	2	4	2	5	5	6	3	3	2	2
25	FEMALE	Slightly	Slightly	Slightly	Slightly	Extremely	Slightly	2	2	2	2	2	4	5	5	1	5	4	5	5	1	1	6	2	2	2	4	4	2	2	2	2	2	2	2	2	3	2	2	2	2	2	3	2	2	2	2	5	5
24	MALE	Slightly	Not at all	Not at all	Not at all	Extremely	Not at all	1	1	4	1	1	2	2	1	2	1	1	2	2	1	2	1	2	2	2	2	2	2	2	2	2	2	2	2	1	2	2	2	1	2	1	2	2	2	2	2	2	6
25	MALE	Slightly	Slightly	Slightly	Slightly	Moderately	Slightly	6	6	6	3	5	2	2	4	4	5	1	2	3	6	6	3	3	6	1	1	2	6	5	5	6	1	3	4	4	1	3	2	1	1	1	5	5	2	6	2	2	2
40	FEMALE	Slightly	Moderately	Slightly	Slightly	Slightly	Moderately	3	4	1	4	3	6	4	3	1	3	3	3	3	6	4	3	3	6	1	4	4	4	3	3	6	1	3	1	3	4	1	3	4	3	3	3	4	4	4	3	1	3
25	FEMALE	Moderately	Moderately	Moderately	Slightly	Slightly	Slightly	4	4	4	1	4	1	4	1	4	4	4	1	4	4	4	1	4	1	4	1	1	1	4	4	4	4	1	4	4	4	4	4	1	1	1	1	4	1	1	4	1	1
39	FEMALE	Not at all	Not at all	Moderately	Not at all	Not at all	Not at all	3	6	4	3	3	3	4	3	3	3	3	3	3	3	3	3	3	3	3	3	4	3	3	4	3	3	3	3	3	4	3	3	3	3	3	3	3	3	3	6	3	6
33	FEMALE	Slightly	Not at all	Extremely	Extremely	Extremely	Not at all	1	2	2	2	1	2	1	1	1	1	1	1	1	1	1	1	1	2	2	2	1	1	1	2	1	1	1	1	2	2	2	2	2	2	2	2	2	1	2	2	2	2
23	FEMALE	Slightly	Not at all	Not at all	Not at all	Extremely	Extremely	3	3	3	3	3	3	3	3	3	3	3	3	3	3	3	3	3	3	3	3	3	3	3	3	3	3	3	3	3	3	3	3	3	3	3	3	3	3	3	3	3	3
20	FEMALE	Moderately	Slightly	Slightly	Slightly	Not at all	Moderately	6	3	6	6	3	2	2	2	1	2	3	3	1	4	4	4	6	3	4	6	4	1	1	4	1	1	4	4	4	1	1	6	4	4	4	3	3	1	1	4	2	4
19	FEMALE	Slightly	Moderately	Moderately	Slightly	Slightly	Moderately	2	2	2	2	2	2	1	2	3	1	2	2	2	2	2	2	1	2	2	2	2	2	2	3	3	3	3	4	3	3	3	6	3	3	3	3	2	2	2	4	1	2
27	FEMALE	Slightly	Slightly	Not at all	Not at all	Extremely	Not at all	4	1	1	1	1	1	1	1	4	1	4	1	1	1	1	1	2	1	1	1	1	2	2	1	2	1	1	1	1	1	1	3	1	1	4	4	1	2	2	1	6	6
35	FEMALE	Slightly	Slightly	Moderately	Not at all	Extremely	Not at all	1	2	2	2	2	4	1	1	1	1	3	1	2	4	4	2	4	2	1	2	3	6	1	1	1	2	6	6	5	5	1	1	2	4	4	3	4	3	4	6	1	6
25	MALE	Slightly	Not at all	Not at all	Not at all	Not at all	Not at all	1	2	2	2	2	3	1	2	6	5	5	5	2	2	2	2	5	5	5	5	2	5	2	5	5	2	2	4	2	2	2	2	2	2	2	2	5	5	2	5	2	2
24	FEMALE	Moderately	Slightly	Slightly	Slightly	Extremely	Slightly	4	5	5	5	2	5	5	5	3	2	3	2	4	1	2	5	5	5	1	5	3	5	5	5	5	4	6	4	4	5	2	2	4	1	5	5	1	2	2	2	2	5
25	MALE	Not at all	Not at all	Not at all	Slightly	Slightly	Not at all	2	2	2	2	2	2	3	2	2	2	2	2	2	6	2	6	6	2	3	6	4	4	1	2	1	4		3	1	1	4	4	4	1	1	2	2	2	2	2	5	5
36	FEMALE	Moderately	Not at all	Slightly	Slightly	Slightly	Not at all	4	3	3	1	1	6	3	5	2	4	2	3	1	4	1	6	3	1	4	2	6	6	4	4	2	1	1	3	4	1	3	4	4	3	4	4	6	3	4	3	4	4
40	FEMALE	Slightly	Not at all	Not at all	Not at all	Moderately	Not at all	3	4	6	5	3	1	3	3	3	6	6	5	6	3	2	1	2	1	4	3	3	6	3	3	4	2	3	3	3	6	3	3	4	2	3	1	5	3	3	3	6	5
25	FEMALE	Slightly	Not at all	Moderately	Not at all	Slightly	Slightly	4	4	6	4	1	6	3	4	1	3	4	4	1	2	3	2	1	4	6	3	3	4	1	4	6	4	3	1	2	3	3	1	4	3	4	4	4	6	1	3	4	4
39	FEMALE	Slightly	Slightly	Slightly	Slightly	Slightly	Slightly	1	4	3	1	4	3	1	4	3	1	5	3	1	3	4	4	3	1	3	4	4	3	3	1	4	4	4	1	1	3	3	3	1	1	4	4	4	4	4	3	3	3
33	FEMALE	Not at all	Not at all	Not at all	Not at all	Moderately	Not at all	3	4	6	5	5	1	2	2	2	2	2	2	2	6	3	3	3	1	1	3	3	3	4	4	6	3	4	4	3	2	3	1	4	3	6	6	6	2	2	2	2	1
23	FEMALE	Slightly	Not at all	Slightly	Not at all	Slightly	Slightly	2	2	4	2	2	1	1	1	1	1	1	1	1	1	2	2	1	4	4	1	2	1	2	1	1	1	1	4	1	4	1	6	1	1	1	3	4	2	1	2	4	3
20	MALE	Slightly	Not at all	Slightly	Slightly	Moderately	Not at all	5	5	3	3	5	3	6	5	1	1	5	6	1	5	3	1	2	1	1	1	3	6	1	1	1	1	1	1	1	4	3	1	3	4	1	1	1	1	4	1	1	1
19	FEMALE	Slightly	Slightly	Moderately	Slightly	Moderately	Slightly	4	4	1	4	3	1	6	5	3	5	4	3	4	1	3	1	6	1	3	4	6	4	6	4	6	1	6	4	3	4	6	3	6	3	1	6	3	6	3	1	3	4
27	FEMALE	Not at all	Not at all	Not at all	Not at all	Not at all	Not at all	6	6	6	6	6	6	5	3	6	6	5	3	3	6	6	3	5	3	6	6	6	5	3	6	3	5	3	6	6	4	4	3	4	6	3	3	6	4	4	4	4	4
33	FEMALE	Extremely	Slightly	Extremely	Extremely	Not at all	Not at all	3	4	3	4	3	4	4	3	4	4	4	4	3	3	3	4	4	4	4	4	3	3	3	3	3	3	3	3	4	4	4	4	4	4	4	4	3	3	1	4	4	4
25	FEMALE	Slightly	Moderately	Moderately	Not at all	Moderately	Not at all	1	4	1	6	4	2	1	4	3	3	4	4	4	4	1	6	4	4	6	4	2	2	1	4	1	1	1	1	1	1	1	1	1	1	1	4	4	3	4	3	3	3
24	FEMALE	Not at all	Moderately	Not at all	Not at all	Extremely	Not at all	6	6	6	1	6	3	6	4	6	5	1	3	4	3	3	4	4	3	3	3	3	3	6	4	5	4	6	6	6	3	4	3	4	4	6	6	4	4	3	6	3	4
28	MALE	Slightly	Not at all	Not at all	Not at all	Moderately	Not at all	1	1	1	1	1	4	1	4	4	3	4	4	3	4	4	4	3	4	4	4	4	4	4	1	4	4	4	3	4	4	4	3	4	1	4	4	4	3	3	4	4	4
36	FEMALE	Moderately	Not at all	Not at all	Not at all	Not at all	Not at all	4	5	5	5	3	5	5	5	5	5	3	5	5	3	1	5	5	5	5	5	5	5	5	5	5	5	5	5	5	5	3	5	3	5	5	5	5	5	2	2	1	5
40	FEMALE	Moderately	Not at all	Slightly	Slightly	Slightly	Slightly	2	1	1	2	4	4	1	4	1	4	1	4	1	2	4	1	4	2	1	1	2	1	4	6	3	1	1	4	1	4	2	1	1	4	2	4	1	3	1	4	1	4
25	MALE	Not at all	Not at all	Not at all	Not at all	Not at all	Not at all	4	3	4	4	4	4	4	4	4	4	4	4	4	4	4	4	4	4	3	4	4	4	4	4	4	4	3	2	4	3	6	5	6	4	3	6	1	3	4	1	3	4
39	MALE	Not at all	Not at all	Not at all	Moderately	Slightly	Not at all	6	3	3	3	4	1	6	3	4	3	4	3	4	6	4	6	4	1	1	3	3	1	3	3	4	3	4	1	6	1	6	1	4	3	1	3	4	3	4	6	3	3
29	FEMALE	Not at all	Not at all	Not at all	Not at all	Not at all	Not at all	2	4	3	5	5	5	4	3	3	2	4	2	4	4	4	3	6	4	4	5	5	5	3	3	3	5	5	5	5	5	3	5	5	5	5	3	4	2	5	1	2	2
33	FEMALE	Slightly	Not at all	Slightly	Not at all	Moderately	Not at all	3	3	3	3	6	2	6	2	1	1	1	4	4	2	2	1	1	6	1	3	4	4	1	3	1	1	2	1	1	1	1	2	2	2	2	2	2	2	2	2	2	3
31	FEMALE	Moderately	Slightly	Moderately	Not at all	Not at all	Not at all	2	2	2	2	2	2	2	4	4	1	2	2	2	1	2	2	3	1	2	2	4	1	2	2	1	2	2	2	2	2	1	2	2	4	1	1	2	2	2	1	1	3
25	FEMALE	Not at all	Slightly	Slightly	Moderately	Slightly	Slightly	4	1	2	1	2	4	4	1	6	2	1	2	1	3	2	6	2	3	2	1	1	1	2	1	2	6	3	5	5	6	6	4	2	2	1	5	5	6	4	4	2	4
30	FEMALE	Not at all	Not at all	Not at all	Not at all	Not at all	Not at all	3	2	1	4	1	3	2	3	3	5	6	6	3	3	1	6	6	3	4	1	6	3	1	3	3	5	6	5	6	5	4	1	2	1	1	3	6	6	6	5	1	1
39	FEMALE	Slightly	Not at all	Slightly	Slightly	Moderately	Slightly	4	4	2	2	2	2	2	2	4	2	5	4	4	4	2	2	2	2	2	2	2	2	2	2	2	2	2	2	2	2	2	5	2	2	2	2	2	2	2	2	2	2
36	FEMALE	Slightly	Not at all	Not at all	Not at all	Extremely	Not at all	2	5	2	2	5	2	2	2	2	2	2	2	2	2	4	6	2	2	1	1	2	2	2	2	2	2	2	2	4	1	2	2	2	2	3	1	3	6	6	2	2	2
40	FEMALE	Slightly	Slightly	Extremely	Moderately	Not at all	Not at all	4	5	6	3	6	2	3	3	1	1	1	4	3	1	1	5	6	5	6	5	4	1	1	1	2	3	1	6	3	3	1	2	2	1	4	3	2	2	2	6	2	2
25	MALE	Not at all	Not at all	Not at all	Not at all	Extremely	Not at all	4	1	2	1	2	4	4	1	6	2	1	2	1	3	2	6	2	3	2	1	1	1	2	1	2	6	3	5	5	6	6	4	2	2	1	5	5	6	4	4	2	4
39	FEMALE	Not at all	Not at all	Slightly	Slightly	Extremely	Not at all	5	6	5	5	6	6	5	5	5	4	3	3	3	3	6	6	3	6	6	6	6	5	5	5	6	6	6	5	6	6	1	4	3	3	6	3	3	1	4	1	3	4
22	FEMALE	Slightly	Extremely	Extremely	Slightly	Slightly	Slightly	3	3	6	6	6	5	6	3	5	6	4	4	5	5	5	6	3	5	5	5	4	3	5	4	1	6	3	3	4	4	3	1	6	1	3	5	6	3	4	5	3	2
36	FEMALE	Slightly	Moderately	Moderately	Not at all	Extremely	Not at all	6	4	5	3	4	1	1	1	4	1	1	1	1	1	1	1	1	4	1	4	4	4	1	4	1	4	4	4	4	4	1	2	1	1	1	2	2	2	2	2	2	4
40	FEMALE	Moderately	Not at all	Moderately	Slightly	Slightly	Moderately	6	5	6	6	6	6	3	6	3	6	6	3	6	3	3	1	3	6	6	6	3	3	4	6	3	3	3	6	4	4	3	4	1	4	4	4	6	6	6	6	3	4
25	FEMALE	Slightly	Slightly	Slightly	Slightly	Slightly	Slightly	2	2	2	2	2	1	2	2	1	2	1	3	2	1	1	3	4	1	3	1	1	1	2	2	2	1	1	3	3	1	2	6	4	3	1	3	4	2	1	4	2	2
39	FEMALE	Not at all	Slightly	Slightly	Slightly	Not at all	Not at all	5	5	5	3	4	5	6	5	3	4	2	6	6	6	6	5	5	5	6	5	5	5	6	5	5	5	5	5	6	6	1	1	4	3	4	3	2	2	2	3	3	4
33	FEMALE	Slightly	Not at all	Moderately	Not at all	Extremely	Not at all	6	2	2	2	2	1	2	2	4	2	2	2	2	1	1	2	3	2	2	6	2	2	2	2	2	4	2	4	2	2	2	6	2	1	2	2	2	2	2	2	2	6
23	FEMALE	Not at all	Slightly	Not at all	Moderately	Slightly	Not at all	6	3	5	6	6	4	1	4	3	4	6	5	1	3	3	4	5	6	5	5	6	3	3	3	6	3	6	6	3	3	1	3	3	3	3	5	6	6	3	1	3	3
20	FEMALE	Not at all	Not at all	Not at all	Not at all	Slightly	Slightly	4	4	2	4	1	2	2	2	5	2	5	4	4	6	4	5	5	5	5	5	3	2	2	2	1	2	2	2	2	2	4	4	2	2	2	1	2	2	5	2	2	2
19	FEMALE	Slightly	Not at all	Not at all	Not at all	Extremely	Moderately	1	2	1	1	1	2	2	2	2	2	3	4	2	4	4	2	1	1	1	1	2	2	2	2	2	2	2	2	2	2	2	2	2	1	1	2	2	1	2	2	2	2
27	MALE	Moderately	Not at all	Not at all	Slightly	Not at all	Not at all	5	5	5	5	5	2	5	5	5	2	3	2	1	4	3	5	5	5	1	5	2	1	2	2	3	5	6	6	6	3	6	6	3	6	5	3	3	4	2	1	5	3
33	FEMALE	Moderately	Extremely	Extremely	Moderately	Slightly	Moderately	2	2	4	2	5	5	5	5	5	5	2	5	5	4	5	2	2	2	5	3	4	2	2	2	2	3	3	6	4	2	6	5	5	2	6	6	5	5	5	5	5	6
25	FEMALE	Slightly	Not at all	Moderately	Not at all	Not at all	Not at all	5	5	5	5	5	3	4	3	3	5	6	3	1	5	6	5	5	5	5	5	3	5	6	5	5	5	5	5	5	5	3	1	5	5	5	5	3	4	3	5	2	2
24	FEMALE	Slightly	Not at all	Not at all	Slightly	Moderately	Not at all	5	5	5	5	5	5	5	5	5	5	5	5	5	5	5	5	5	5	5	5	5	5	2	4	5	5	2	2	1	1	1	1	2	2	2	5	5	5	5	5	5	5
25	MALE	Not at all	Not at all	Not at all	Not at all	Not at all	Not at all	4	4	2	2	4	1	2	2	2	4	1	4	3	3	1	2	5	4	2	4	3	2	2	2	2	2	2	4	3	1	2	5	3	2	2	4	2	2	2	2	2	2
36	MALE	Slightly	Not at all	Not at all	Not at all	Not at all	Not at all	2	3	3	3	2	2	4	3	2	6	4	4	4	4	4	4	4	4	4	4	4	4	4	4	4	4	4	4	4	4	4	4	4	4	4	4	4	4	4	4	4	4
33	FEMALE	Not at all	Not at all	Not at all	Not at all	Not at all	Not at all	6	6	5	6	6	6	6	6	4	6	4	3	3	3	3	6	3	3	3	3	6	5	6	4	4	3	3	1	6	3	3	3	4	3	5	3	4	3	4	3	3	3
28	MALE	Not at all	Not at all	Not at all	Not at all	Extremely	Not at all	5	5	5	5	5	5	5	5	5	5	5	5	5	5	5	5	5	5	5	5	5	5	5	5	5	5	5	5	6	3	6	5	5	5	5	5	5	5	5	5	5	5
20	FEMALE	Not at all	Not at all	Slightly	Not at all	Moderately	Not at all	5	3	3	4	3	2	2	2	2	2	5	3	3	3	4	4	3	1	1	4	2	2	2	2	2	2	2	2	2	2	2	2	2	2	1	1	1	3	3	3	2	4
39	FEMALE	Slightly	Not at all	Not at all	Not at all	Extremely	Not at all	4	4	3	5	4	5	5	5	6	5	6	6	5	6	3	5	3	5	5	5	3	1	2	3	6	3	4	4	4	4	3	4	5	3	3	5	6	6	4	5	5	3
33	FEMALE	Not at all	Not at all	Not at all	Not at all	Moderately	Moderately	3	4	6	6	5	5	4	5	5	4	3	5	1	2	2	2	2	2	2	2	2	2	2	2	2	1	2	2	2	2	1	4	2	2	2	1	3	2	2	3	4	2
19	FEMALE	Not at all	Not at all	Not at all	Not at all	Not at all	Not at all	4	3	2	1	1	2	1	4	4	3	2	4	3	1	4	1	5	6	6	3	6	1	2	3	4	1	4	4	3	3	3	4	5	4	4	4	6	6	1	1	1	1
20	FEMALE	Slightly	Not at all	Slightly	Moderately	Slightly	Slightly	6	6	6	3	6	4	1	6	3	2	4	3	3	3	6	2	4	3	4	3	3	3	2	3	3	3	4	3	4	4	1	2	4	1	1	6	6	3	4	4	3	1
29	FEMALE	Not at all	Not at all	Slightly	Not at all	Extremely	Not at all	5	5	5	1	1	5	4	5	1	4	3	5	4	3	2	5	6	4	3	6	2	2	2	1	2	4	2	3	2	2	6	5	4	2	2	5	5	3	4	3	2	4
24	FEMALE	Not at all	Not at all	Slightly	Not at all	Extremely	Not at all	4	4	4	4	3	3	4	4	4	4	4	4	4	4	4	4	4	4	4	4	4	4	4	4	4	4	4	4	4	4	4	4	4	6	4	4	4	3	4	3	3	3
21	FEMALE	Not at all	Not at all	Not at all	Not at all	Extremely	Not at all	1	1	4	1	3	2	2	2	1	2	2	2	2	2	2	2	5	4	4	4	2	2	2	2	2	4	2	4	1	2	2	2	2	2	2	2	2	2	2	2	2	1
33	FEMALE	Extremely	Moderately	Moderately	Not at all	Extremely	Not at all	1	3	6	6	6	5	5	5	5	5	4	4	4	4	4	6	4	4	4	4	1	1	1	5	4	3		3	5	5	3	3	3	4	6	5	4	3	6	4	3	3
31	FEMALE	Slightly	Not at all	Slightly	Not at all	Extremely	Not at all	2	2	2	2	2	2	2	2	2	2	2	2	2	2	2	2	2	1	2	2	2	1	2	2	2	4	1	1	1	1	4	1	2	2	1	1	2	1	2	2	2	2
25	FEMALE	Slightly	Not at all	Extremely	Slightly	Slightly	Not at all	4	5	4	4	1	4	3	1	4	3	1	6	1	3	1	2	4	5	4	3	5	2	1	4	6	3	3	3	5	2	2	6	4	3	3	4	3	6	4	3	6	2
22	MALE	Not at all	Not at all	Not at all	Not at all	Moderately	Not at all	4	4	1	6	3	3	5	4	3	3	5	6	6	3	6	6	4	3	6	1	1	2	1	2	4	1	6	1	3	3	6	4	6	3	6	3	6	5	3	3	5	4
30	FEMALE	Extremely	Moderately	Moderately	Slightly	Slightly	Slightly	6	3	6	5	4	4	4	6	1	6	5	5	3	5	4	5	5	6	6	6	4	4	4	1	4	4	4	4	1	1	4	4	3	3	3	5	5	3	4	5	3	1
22	MALE	Not at all	Slightly	Moderately	Not at all	Not at all	Not at all	5	5	4	5	5	5	5	5	5	5	6	3	5	5	5	5	5	5	5	5	4	5	2	5	5	6	2	6	6	2	2	2	5	4	5	5	5	4	5	2	5	2
36	FEMALE	Not at all	Not at all	Not at all	Not at all	Slightly	Not at all	2	6	2	4	2	2	2	1	4	4	2	3	2	2	2	2	4	4	4	4	2	2	2	2	4	2	2	4	4	2	2	2	2	2	2	6	5	1	1	2	2	2
40	FEMALE	Not at all	Not at all	Not at all	Not at all	Not at all	Not at all	4	6	6	5	6	5	5	5	5	6	6	4	4	4	4	5	6	5	6	6	3	3	3	5	5	5	6	5	5	5	5	4	3	4	6	6	5	6	4	3	4	4
25	FEMALE	Moderately	Slightly	Slightly	Slightly	Moderately	Moderately	2	2	2	2	2	2	1	4	2	1	1	2	2	2	2	4	4	1	2	1	1	1	2	2	2	2	2	4	4	4	4	2	2	2	2	1	1	1	2	4	2	2
39	FEMALE	Moderately	Moderately	Slightly	Slightly	Slightly	Not at all	1	1	2	3	2	2	5	5	3	5	6	3	5	6	3	4	1	6	6	6	5	5	5	5	3	2	2	2	2	2	2	4	2	2	2	3	3	2	2	2	2	1
33	FEMALE	Not at all	Not at all	Not at all	Not at all	Extremely	Not at all	4	4	4	1	1	2	2	2	1	1	4	5	3	6	3	1	3	1	4	1	1	4	1	4	1	4	4	4	4	2	2	2	2	2	2	1	6	3	1	5	2	5
23	FEMALE	Not at all	Slightly	Moderately	Not at all	Moderately	Not at all	2	2	2	1	2	1	1	1	2	2	3	1	2	1	4	1	1	2	2	1	2	2	2	2	2	2	2	1	2	2	1	2	1	1	1	1	1	2	2	1	2	3
20	FEMALE	Not at all	Not at all	Not at all	Slightly	Slightly	Slightly	1	6	5	3	6	3	1	5	1	2	2	2	2	2	2	1	3	1	1	1	1	4	1	1	1	1	5	1	2	2	4	2	4	2	1	2	2	2	2	4	2	4
19	FEMALE	Not at all	Not at all	Not at all	Not at all	Slightly	Not at all	4	4	3	6	1	1	1	1	4	2	4	4	2	6	1	4	3	1	3	4	1	2	2	2	2	1	2	4	4	1	1	1	4	1	4	3	2	4	2	4	6	4
27	FEMALE	Slightly	Not at all	Slightly	Moderately	Moderately	Not at all	1	2	2	4	2	4	2	2	2	2	4	2	2	4	4	4	4	6	4	5	5	5	3	4	6	6	1	3	3	4	1	2	4	2	3	5	3	3	5	6	3	1
33	FEMALE	Extremely	Moderately	Extremely	Moderately	Extremely	Moderately	2	2	2	2	2	2	1	2	2	2	2	2	2	2	1	2	2	2	2	2	2	2	2	2	2	2	4	1	1	1	1	1	1	3	1	1	1	1	1	1	1	1
25	MALE	Not at all	Not at all	Not at all	Not at all	Not at all	Not at all	4	3	4	3	6	1	1	4	4	1	4	1	4	3	3	3	6	1	1	4	2	2	3	2	1	3	4	4	1	4	1	1	4	4	3	4	3	3	4	4	3	3
24	FEMALE	Not at all	Not at all	Slightly	Not at all	Slightly	Not at all	1	2	2	2	2	2	2	2	2	2	4	3	2	3	3	2	4	1	2	2	2	2	2	2	2	2	2	2	2	2	2	2	2	2	2	5	5	5	2	2	2	2
25	FEMALE	Not at all	Slightly	Slightly	Not at all	Slightly	Not at all	3	1	5	5	2	1	2	5	3	5	1	6	1	3	4	5	3	6	3	4	5	5	5	5	6	5	4	5	5	6	3	1	2	3	5	3	4	1	2	2	3	3
36	MALE	Not at all	Slightly	Extremely	Moderately	Not at all	Not at all	6	5	5	5	6	3	1	4	6	6	4	5	2	6	3	5	5	6	5	5	6	6	3	5	6	5	5	5	5	5	5	1	3	3	5	5	6	6	5	6	2	2
33	FEMALE	Slightly	Not at all	Moderately	Extremely	Moderately	Not at all	2	2	2	2	2	2	2	2	2	2	2	2	2	2	2	2	2	2	2	2	2	2	2	2	2	2	2	1	2	2	2	2	2	2	2	2	2	2	2	2	2	2
28	MALE	Slightly	Not at all	Moderately	Not at all	Extremely	Moderately	1	3	1	1	1	1	2	2	6	3	1	6	6	5	5	6	6	6	5	5	3	3	6	5	6	5	6	5	6	5	4	4	6	3	5	6	5	4	1	5	3	2
20	FEMALE	Slightly	Not at all	Slightly	Not at all	Not at all	Slightly	3	4	3	3	4	6	3	3	3	6	3	4	6	3	5	3	2	3	1	3	5	5	5	6	3	1	1	1	4	4	2	4	2	6	4	3	6	5	6	6	3	2
39	FEMALE	Moderately	Not at all	Moderately	Not at all	Not at all	Slightly	6	3	3	3	3	2	2	4	2	5	2	5	5	5	3	2	5	3	5	5	2	2	2	3	2	2	4	2	2	4	4	2	5	2	2	5	4	2	2	5	2	3
33	FEMALE	Not at all	Not at all	Not at all	Not at all	Extremely	Not at all	6	6	5	3	3	4	4	3	2	4	3	4	4	4	4	4	4	3	6	4	1	1	5	5	3	6	3	3	3	1	6	3	3	4	4	3	6	5	3	6	4	1
19	FEMALE	Moderately	Moderately	Moderately	Slightly	Extremely	Not at all	2	2	2	2	2	2	2	2	2	2	2	2	2	2	2	2	2	2	2	2	2	2	2	2	2	2	2	2	2	2	2	2	2	2	2	2	2	2	2	2	2	2
20	FEMALE	Not at all	Slightly	Slightly	Not at all	Extremely	Extremely	6	3	5	5	1	2	2	4	2	4	3	6	4	1	6	2	1	4	3	6	1	2	2	4	2	2	2	1	3	1	2	1	2	2	2	5	5	2	2	6	2	2
19	FEMALE	Slightly	Not at all	Slightly	Slightly	Moderately	Not at all	3	3	6	6	3	6	1	1	3	4	1	4	3	3	3	3	4	3	4	3	6	6	6	6	3	6	4	3	3	3	4	2	4	1	1	3	1	1	1	6	6	6
24	FEMALE	Slightly	Not at all	Not at all	Not at all	Not at all	Slightly	1	3	6	3	1	3	2	2	3	6	1	2	6	6	6	3	3	3	6	5	6	6	4	5	3	6	6	3	6	6	2	4	6	6	6	2	2	6	2	2	4	3
29	FEMALE	Slightly	Not at all	Slightly	Not at all	Extremely	Not at all	6	6	5	4	6	2	2	6	2	5	1	5	6	4	1	6	3	6	6	3	3	5	2	6	6	5	1	4	4	1	2	2	4	2	2	3	4	2	2	2	2	3
33	FEMALE	Slightly	Slightly	Not at all	Moderately	Extremely	Not at all	2	2	2	1	1	5	5	5	1	1	2	2	2	2	2	2	2	2	2	1	2	2	1	2	1	2	2	1	1	1	1	2	2	2	5	2	2	2	2	2	2	2
31	FEMALE	Moderately	Not at all	Not at all	Slightly	Not at all	Not at all	1	1	1	1	1	1	4	1	1	2	2	2	2	2	2	2	1	2	2	2	2	2	2	1	2	1	2	2	1	2	2	2	2	1	1	2	1	2	2	1	1	1
25	FEMALE	Moderately	Moderately	Moderately	Moderately	Moderately	Moderately	2	3	3	3	3	6	4	3	4	4	6	6	5	6	6	6	6	4	4	3	6	2	2	1	1	1	1	1	1	1	1	2	2	2	2	2	1	1	1	5	1	2
30	MALE	Not at all	Extremely	Slightly	Moderately	Extremely	Slightly	2	2	2	2	4	2	1	2	3	2	1	1	1	2	1	2	1	2	2	2	2	4	2	1	4	1	2	2	1	1	2	2	2	2	2	2	4	4	4	2	1	2
39	FEMALE	Slightly	Not at all	Moderately	Slightly	Not at all	Slightly	1	3	5	3	5	2	2	5	5	5	2	4	4	4	2	5	3	3	4	6	4	4	2	3	6	6	1	3	1	1	2	2	2	4	2	5	5	6	3	3	2	2
36	FEMALE	Not at all	Not at all	Not at all	Not at all	Not at all	Not at all	2	2	2	2	2	4	5	5	1	5	4	5	5	1	1	6	2	2	2	4	4	2	2	2	2	2	2	2	2	3	2	2	2	2	2	3	2	2	2	2	5	5
40	MALE	Not at all	Not at all	Not at all	Not at all	Not at all	Not at all	1	1	4	1	1	2	2	1	2	1	1	2	2	1	2	1	2	2	2	2	2	2	2	2	2	2	2	2	1	2	2	2	1	2	1	2	2	2	2	2	2	6
25	FEMALE	Slightly	Slightly	Slightly	Not at all	Extremely	Not at all	6	6	6	3	5	2	2	4	4	5	1	2	3	6	6	3	3	6	1	1	2	6	5	5	6	1	3	4	4	1	3	2	1	1	1	5	5	2	6	2	2	2
39	MALE	Not at all	Slightly	Slightly	Slightly	Extremely	Slightly	3	4	1	4	3	6	4	3	1	3	3	3	3	6	4	3	3	6	1	4	4	4	3	3	6	1	3	1	3	4	1	3	4	3	3	3	4	4	4	3	1	3
33	FEMALE	Not at all	Not at all	Moderately	Slightly	Slightly	Not at all	4	4	4	1	4	1	4	1	4	4	4	1	4	4	4	1	4	1	4	1	1	1	4	4	4	4	1	4	4	4	4	4	1	1	1	1	4	1	1	4	1	1
23	MALE	Slightly	Not at all	Slightly	Not at all	Extremely	Not at all	3	6	4	3	3	3	4	3	3	3	3	3	3	3	3	3	3	3	3	3	4	3	3	4	3	3	3	3	3	4	3	3	3	3	3	3	3	3	3	6	3	6
20	FEMALE	Extremely	Slightly	Slightly	Slightly	Slightly	Moderately	1	2	2	2	1	2	1	1	1	1	1	1	1	1	1	1	1	2	2	2	1	1	1	2	1	1	1	1	2	2	2	2	2	2	2	2	2	1	2	2	2	2
19	FEMALE	Slightly	Not at all	Moderately	Slightly	Not at all	Not at all	3	3	3	3	3	3	3	3	3	3	3	3	3	3	3	3	3	3	3	3	3	3	3	3	3	3	3	3	3	3	3	3	3	3	3	3	3	3	3	3	3	3
27	MALE	Not at all	Moderately	Slightly	Slightly	Extremely	Slightly	6	3	6	6	3	2	2	2	1	2	3	3	1	4	4	4	6	3	4	6	4	1	1	4	1	1	4	4	4	1	1	6	4	4	4	3	3	1	1	4	2	4
33	MALE	Not at all	Not at all	Not at all	Not at all	Extremely	Not at all	2	2	2	2	2	2	1	2	3	1	2	2	2	2	2	2	1	2	2	2	2	2	2	3	3	3	3	4	3	3	3	6	3	3	3	3	2	2	2	4	1	2
25	MALE	Not at all	Not at all	Not at all	Not at all	Extremely	Not at all	4	1	1	1	1	1	1	1	4	1	4	1	1	1	1	1	2	1	1	1	1	2	2	1	2	1	1	1	1	1	1	3	1	1	4	4	1	2	2	1	6	6
24	FEMALE	Slightly	Moderately	Moderately	Not at all	Moderately	Not at all	1	2	2	2	2	4	1	1	1	1	3	1	2	4	4	2	4	2	1	2	3	6	1	1	1	2	6	6	5	5	1	1	2	4	4	3	4	3	4	6	1	6
25	FEMALE	Not at all	Not at all	Not at all	Not at all	Extremely	Not at all	1	2	2	2	2	3	1	2	6	5	5	5	2	2	2	2	5	5	5	5	2	5	2	5	5	2	2	4	2	2	2	2	2	2	2	2	5	5	2	5	2	2
36	FEMALE	Moderately	Moderately	Extremely	Slightly	Slightly	Not at all	4	5	5	5	2	5	5	5	3	2	3	2	4	1	2	5	5	5	1	5	3	5	5	5	5	4	6	4	4	5	2	2	4	1	5	5	1	2	2	2	2	5
33	FEMALE	Extremely	Extremely	Moderately	Slightly	Moderately	Not at all	2	2	2	2	2	2	3	2	2	2	2	2	2	6	2	6	6	2	3	6	4	4	1	2	1	4		3	1	1	4	4	4	1	1	2	2	2	2	2	5	5
36	MALE	Not at all	Not at all	Not at all	Not at all	Extremely	Not at all	4	3	3	1	1	6	3	5	2	4	2	3	1	4	1	6	3	1	4	2	6	6	4	4	2	1	1	3	4	1	3	4	4	3	4	4	6	3	4	3	4	4
33	FEMALE	Not at all	Not at all	Not at all	Not at all	Not at all	Not at all	3	4	6	5	3	1	3	3	3	6	6	5	6	3	2	1	2	1	4	3	3	6	3	3	4	2	3	3	3	6	3	3	4	2	3	1	5	3	3	3	6	5
28	MALE	Not at all	Not at all	Not at all	Not at all	Not at all	Not at all	4	4	6	4	1	6	3	4	1	3	4	4	1	2	3	2	1	4	6	3	3	4	1	4	6	4	3	1	2	3	3	1	4	3	4	4	4	6	1	3	4	4
20	FEMALE	Extremely	Moderately	Extremely	Slightly	Slightly	Not at all	1	4	3	1	4	3	1	4	3	1	5	3	1	3	4	4	3	1	3	4	4	3	3	1	4	4	4	1	1	3	3	3	1	1	4	4	4	4	4	3	3	3
39	FEMALE	Extremely	Extremely	Extremely	Not at all	Not at all	Not at all	3	4	6	5	5	1	2	2	2	2	2	2	2	6	3	3	3	1	1	3	3	3	4	4	6	3	4	4	3	2	3	1	4	3	6	6	6	2	2	2	2	1
33	FEMALE	Not at all	Not at all	Not at all	Not at all	Not at all	Not at all	2	2	4	2	2	1	1	1	1	1	1	1	1	1	2	2	1	4	4	1	2	1	2	1	1	1	1	4	1	4	1	6	1	1	1	3	4	2	1	2	4	3
19	MALE	Slightly	Not at all	Extremely	Not at all	Not at all	Not at all	5	5	3	3	5	3	6	5	1	1	5	6	1	5	3	1	2	1	1	1	3	6	1	1	1	1	1	1	1	4	3	1	3	4	1	1	1	1	4	1	1	1
20	FEMALE	Slightly	Moderately	Not at all	Not at all	Not at all	Not at all	4	4	1	4	3	1	6	5	3	5	4	3	4	1	3	1	6	1	3	4	6	4	6	4	6	1	6	4	3	4	6	3	6	3	1	6	3	6	3	1	3	4
19	FEMALE	Not at all	Not at all	Slightly	Not at all	Extremely	Not at all	6	6	6	6	6	6	5	3	6	6	5	3	3	6	6	3	5	3	6	6	6	5	3	6	3	5	3	6	6	4	4	3	4	6	3	3	6	4	4	4	4	4
25	FEMALE	Not at all	Not at all	Slightly	Not at all	Slightly	Not at all	3	4	3	4	3	4	4	3	4	4	4	4	3	3	3	4	4	4	4	4	3	3	3	3	3	3	3	3	4	4	4	4	4	4	4	4	3	3	1	4	4	4
24	MALE	Not at all	Not at all	Not at all	Not at all	Slightly	Moderately	1	4	1	6	4	2	1	4	3	3	4	4	4	4	1	6	4	4	6	4	2	2	1	4	1	1	1	1	1	1	1	1	1	1	1	4	4	3	4	3	3	3
25	MALE	Not at all	Slightly	Extremely	Slightly	Not at all	Not at all	6	6	6	1	6	3	6	4	6	5	1	3	4	3	3	4	4	3	3	3	3	3	6	4	5	4	6	6	6	3	4	3	4	4	6	6	4	4	3	6	3	4
36	FEMALE	Not at all	Not at all	Not at all	Not at all	Slightly	Not at all	1	1	1	1	1	4	1	4	4	3	4	4	3	4	4	4	3	4	4	4	4	4	4	1	4	4	4	3	4	4	4	3	4	1	4	4	4	3	3	4	4	4
33	FEMALE	Moderately	Not at all	Moderately	Moderately	Moderately	Moderately	4	5	5	5	3	5	5	5	5	5	3	5	5	3	1	5	5	5	5	5	5	5	5	5	5	5	5	5	5	5	3	5	3	5	5	5	5	5	2	2	1	5
28	FEMALE	Extremely	Moderately	Moderately	Not at all	Not at all	Not at all	2	1	1	2	4	4	1	4	1	4	1	4	1	2	4	1	4	2	1	1	2	1	4	6	3	1	1	4	1	4	2	1	1	4	2	4	1	3	1	4	1	4
20	FEMALE	Moderately	Moderately	Extremely	Moderately	Slightly	Not at all	4	3	4	4	4	4	4	4	4	4	4	4	4	4	4	4	4	4	3	4	4	4	4	4	4	4	3	2	4	3	6	5	6	4	3	6	1	3	4	1	3	4
39	FEMALE	Slightly	Not at all	Not at all	Not at all	Moderately	Not at all	6	3	3	3	4	1	6	3	4	3	4	3	4	6	4	6	4	1	1	3	3	1	3	3	4	3	4	1	6	1	6	1	4	3	1	3	4	3	4	6	3	3
33	FEMALE	Moderately	Not at all	Moderately	Not at all	Extremely	Not at all	2	4	3	5	5	5	4	3	3	2	4	2	4	4	4	3	6	4	4	5	5	5	3	3	3	5	5	5	5	5	3	5	5	5	5	3	4	2	5	1	2	2
19	FEMALE	Not at all	Not at all	Slightly	Not at all	Extremely	Slightly	3	3	3	3	6	2	6	2	1	1	1	4	4	2	2	1	1	6	1	3	4	4	1	3	1	1	2	1	1	1	1	2	2	2	2	2	2	2	2	2	2	3
20	MALE	Not at all	Not at all	Not at all	Not at all	Not at all	Not at all	2	2	2	2	2	2	2	4	4	1	2	2	2	1	2	2	3	1	2	2	4	1	2	2	1	2	2	2	2	2	1	2	2	4	1	1	2	2	2	1	1	3
29	FEMALE	Not at all	Not at all	Not at all	Not at all	Not at all	Not at all	4	1	2	1	2	4	4	1	6	2	1	2	1	3	2	6	2	3	2	1	1	1	2	1	2	6	3	5	5	6	6	4	2	2	1	5	5	6	4	4	2	4
24	MALE	Slightly	Slightly	Slightly	Slightly	Slightly	Slightly	3	2	1	4	1	3	2	3	3	5	6	6	3	3	1	6	6	3	4	1	6	3	1	3	3	5	6	5	6	5	4	1	2	1	1	3	6	6	6	5	1	1
21	FEMALE	Not at all	Not at all	Moderately	Not at all	Extremely	Not at all	4	4	2	2	2	2	2	2	4	2	5	4	4	4	2	2	2	2	2	2	2	2	2	2	2	2	2	2	2	2	2	5	2	2	2	2	2	2	2	2	2	2
33	FEMALE	Extremely	Extremely	Extremely	Moderately	Slightly	Slightly	2	5	2	2	5	2	2	2	2	2	2	2	2	2	4	6	2	2	1	1	2	2	2	2	2	2	2	2	4	1	2	2	2	2	3	1	3	6	6	2	2	2
31	MALE	Not at all	Not at all	Not at all	Not at all	Not at all	Not at all	4	5	6	3	6	2	3	3	1	1	1	4	3	1	1	5	6	5	6	5	4	1	1	1	2	3	1	6	3	3	1	2	2	1	4	3	2	2	2	6	2	2
25	FEMALE	Not at all	Not at all	Not at all	Not at all	Not at all	Not at all	4	1	2	1	2	4	4	1	6	2	1	2	1	3	2	6	2	3	2	1	1	1	2	1	2	6	3	5	5	6	6	4	2	2	1	5	5	6	4	4	2	4
40	FEMALE	Slightly	Slightly	Moderately	Extremely	Slightly	Not at all	2	2	2	2	2	1	2	2	1	2	1	3	2	1	1	3	4	1	3	1	1	1	2	2	2	1	1	3	3	1	2	6	4	3	1	3	4	2	1	4	2	2
25	FEMALE	Moderately	Not at all	Extremely	Slightly	Slightly	Not at all	5	5	5	3	4	5	6	5	3	4	2	6	6	6	6	5	5	5	6	5	5	5	6	5	5	5	5	5	6	6	1	1	4	3	4	3	2	2	2	3	3	4
39	FEMALE	Not at all	Not at all	Not at all	Not at all	Not at all	Not at all	6	2	2	2	2	1	2	2	4	2	2	2	2	1	1	2	3	2	2	6	2	2	2	2	2	4	2	4	2	2	2	6	2	1	2	2	2	2	2	2	2	6
29	FEMALE	Not at all	Not at all	Not at all	Not at all	Not at all	Not at all	6	3	5	6	6	4	1	4	3	4	6	5	1	3	3	4	5	6	5	5	6	3	3	3	6	3	6	6	3	3	1	3	3	3	3	5	6	6	3	1	3	3
33	MALE	Slightly	Not at all	Slightly	Not at all	Moderately	Not at all	4	4	2	4	1	2	2	2	5	2	5	4	4	6	4	5	5	5	5	5	3	2	2	2	1	2	2	2	2	2	4	4	2	2	2	1	2	2	5	2	2	2
31	FEMALE	Moderately	Moderately	Moderately	Slightly	Slightly	Slightly	1	2	1	1	1	2	2	2	2	2	3	4	2	4	4	2	1	1	1	1	2	2	2	2	2	2	2	2	2	2	2	2	2	1	1	2	2	1	2	2	2	2
25	MALE	Slightly	Not at all	Not at all	Not at all	Slightly	Not at all	5	5	5	5	5	2	5	5	5	2	3	2	1	4	3	5	5	5	1	5	2	1	2	2	3	5	6	6	6	3	6	6	3	6	5	3	3	4	2	1	5	3
30	FEMALE	Not at all	Not at all	Not at all	Not at all	Extremely	Not at all	2	2	4	2	5	5	5	5	5	5	2	5	5	4	5	2	2	2	5	3	4	2	2	2	2	3	3	6	4	2	6	5	5	2	6	6	5	5	5	5	5	6
39	FEMALE	Slightly	Not at all	Not at all	Not at all	Extremely	Not at all	5	5	5	5	5	3	4	3	3	5	6	3	1	5	6	5	5	5	5	5	3	5	6	5	5	5	5	5	5	5	3	1	5	5	5	5	3	4	3	5	2	2
36	FEMALE	Not at all	Not at all	Not at all	Not at all	Not at all	Not at all	5	5	5	5	5	5	5	5	5	5	5	5	5	5	5	5	5	5	5	5	5	5	2	4	5	5	2	2	1	1	1	1	2	2	2	5	5	5	5	5	5	5
40	FEMALE	Slightly	Not at all	Moderately	Slightly	Slightly	Slightly	4	4	2	2	4	1	2	2	2	4	1	4	3	3	1	2	5	4	2	4	3	2	2	2	2	2	2	4	3	1	2	5	3	2	2	4	2	2	2	2	2	2
25	FEMALE	Not at all	Not at all	Slightly	Slightly	Slightly	Slightly	2	3	3	3	2	2	4	3	2	6	4	4	4	4	4	4	4	4	4	4	4	4	4	4	4	4	4	4	4	4	4	4	4	4	4	4	4	4	4	4	4	4
39	FEMALE	Not at all	Slightly	Not at all	Not at all	Moderately	Not at all	6	6	5	6	6	6	6	6	4	6	4	3	3	3	3	6	3	3	3	3	6	5	6	4	4	3	3	1	6	3	3	3	4	3	5	3	4	3	4	3	3	3
33	FEMALE	Not at all	Not at all	Slightly	Slightly	Extremely	Not at all	5	5	5	5	5	5	5	5	5	5	5	5	5	5	5	5	5	5	5	5	5	5	5	5	5	5	5	5	6	3	6	5	5	5	5	5	5	5	5	5	5	5
23	FEMALE	Not at all	Not at all	Not at all	Not at all	Slightly	Not at all	5	3	3	4	3	2	2	2	2	2	5	3	3	3	4	4	3	1	1	4	2	2	2	2	2	2	2	2	2	2	2	2	2	2	1	1	1	3	3	3	2	4
20	FEMALE	Slightly	Slightly	Moderately	Slightly	Moderately	Not at all	4	4	3	5	4	5	5	5	6	5	6	6	5	6	3	5	3	5	5	5	3	1	2	3	6	3	4	4	4	4	3	4	5	3	3	5	6	6	4	5	5	3
23	FEMALE	Slightly	Slightly	Not at all	Not at all	Extremely	Not at all	2	6	2	4	2	2	2	1	4	4	2	3	2	2	2	2	4	4	4	4	2	2	2	2	4	2	2	4	4	2	2	2	2	2	2	6	5	1	1	2	2	2
20	FEMALE	Not at all	Not at all	Not at all	Not at all	Not at all	Not at all	4	6	6	5	6	5	5	5	5	6	6	4	4	4	4	5	6	5	6	6	3	3	3	5	5	5	6	5	5	5	5	4	3	4	6	6	5	6	4	3	4	4
19	FEMALE	Slightly	Not at all	Not at all	Slightly	Not at all	Not at all	2	2	2	2	2	2	1	4	2	1	1	2	2	2	2	4	4	1	2	1	1	1	2	2	2	2	2	4	4	4	4	2	2	2	2	1	1	1	2	4	2	2
27	FEMALE	Not at all	Not at all	Slightly	Not at all	Extremely	Not at all	1	1	2	3	2	2	5	5	3	5	6	3	5	6	3	4	1	6	6	6	5	5	5	5	3	2	2	2	2	2	2	4	2	2	2	3	3	2	2	2	2	1
33	MALE	Not at all	Not at all	Not at all	Not at all	Extremely	Not at all	4	4	4	1	1	2	2	2	1	1	4	5	3	6	3	1	3	1	4	1	1	4	1	4	1	4	4	4	4	2	2	2	2	2	2	1	6	3	1	5	2	5
25	MALE	Moderately	Slightly	Moderately	Extremely	Moderately	Not at all	2	2	2	1	2	1	1	1	2	2	3	1	2	1	4	1	1	2	2	1	2	2	2	2	2	2	2	1	2	2	1	2	1	1	1	1	1	2	2	1	2	3
21	FEMALE	Not at all	Not at all	Not at all	Not at all	Moderately	Not at all	6	6	5	3	3	4	4	3	2	4	3	4	4	4	4	4	4	3	6	4	1	1	5	5	3	6	3	3	3	1	6	3	3	4	4	3	6	5	3	6	4	1
33	FEMALE	Not at all	Not at all	Not at all	Not at all	Not at all	Not at all	2	2	2	2	2	2	2	2	2	2	2	2	2	2	2	2	2	2	2	2	2	2	2	2	2	2	2	2	2	2	2	2	2	2	2	2	2	2	2	2	2	2
31	FEMALE	Not at all	Slightly	Slightly	Slightly	Not at all	Not at all	6	3	5	5	1	2	2	4	2	4	3	6	4	1	6	2	1	4	3	6	1	2	2	4	2	2	2	1	3	1	2	1	2	2	2	5	5	2	2	6	2	2
25	FEMALE	Moderately	Extremely	Moderately	Slightly	Slightly	Not at all	3	3	6	6	3	6	1	1	3	4	1	4	3	3	3	3	4	3	4	3	6	6	6	6	3	6	4	3	3	3	4	2	4	1	1	3	1	1	1	6	6	6
22	FEMALE	Slightly	Not at all	Not at all	Moderately	Not at all	Slightly	1	3	6	3	1	3	2	2	3	6	1	2	6	6	6	3	3	3	6	5	6	6	4	5	3	6	6	3	6	6	2	4	6	6	6	2	2	6	2	2	4	3
30	FEMALE	Not at all	Not at all	Moderately	Not at all	Moderately	Not at all	6	6	5	4	6	2	2	6	2	5	1	5	6	4	1	6	3	6	6	3	3	5	2	6	6	5	1	4	4	1	2	2	4	2	2	3	4	2	2	2	2	3
22	FEMALE	Moderately	Not at all	Slightly	Not at all	Extremely	Not at all	2	2	2	1	1	5	5	5	1	1	2	2	2	2	2	2	2	2	2	1	2	2	1	2	1	2	2	1	1	1	1	2	2	2	5	2	2	2	2	2	2	2
36	FEMALE	Not at all	Not at all	Not at all	Not at all	Not at all	Moderately	1	1	1	1	1	1	4	1	1	2	2	2	2	2	2	2	1	2	2	2	2	2	2	1	2	1	2	2	1	2	2	2	2	1	1	2	1	2	2	1	1	1
40	FEMALE	Extremely	Slightly	Slightly	Slightly	Not at all	Moderately	2	3	3	3	3	6	4	3	4	4	6	6	5	6	6	6	6	4	4	3	6	2	2	1	1	1	1	1	1	1	1	2	2	2	2	2	1	1	1	5	1	2
25	MALE	Slightly	Slightly	Moderately	Not at all	Slightly	Slightly	2	2	2	2	4	2	1	2	3	2	1	1	1	2	1	2	1	2	2	2	2	4	2	1	4	1	2	2	1	1	2	2	2	2	2	2	4	4	4	2	1	2
39	FEMALE	Not at all	Not at all	Not at all	Not at all	Extremely	Not at all	1	3	5	3	5	2	2	5	5	5	2	4	4	4	2	5	3	3	4	6	4	4	2	3	6	6	1	3	1	1	2	2	2	4	2	5	5	6	3	3	2	2
33	FEMALE	Moderately	Not at all	Not at all	Not at all	Moderately	Not at all	2	2	2	2	2	4	5	5	1	5	4	5	5	1	1	6	2	2	2	4	4	2	2	2	2	2	2	2	2	3	2	2	2	2	2	3	2	2	2	2	5	5
23	FEMALE	Extremely	Extremely	Extremely	Extremely	Extremely	Extremely	1	1	4	1	1	2	2	1	2	1	1	2	2	1	2	1	2	2	2	2	2	2	2	2	2	2	2	2	1	2	2	2	1	2	1	2	2	2	2	2	2	6
20	MALE	Not at all	Not at all	Not at all	Not at all	Not at all	Not at all	6	6	6	3	5	2	2	4	4	5	1	2	3	6	6	3	3	6	1	1	2	6	5	5	6	1	3	4	4	1	3	2	1	1	1	5	5	2	6	2	2	2
19	FEMALE	Not at all	Not at all	Not at all	Not at all	Not at all	Not at all	3	4	1	4	3	6	4	3	1	3	3	3	3	6	4	3	3	6	1	4	4	4	3	3	6	1	3	1	3	4	1	3	4	3	3	3	4	4	4	3	1	3
27	FEMALE	Not at all	Slightly	Moderately	Not at all	Extremely	Not at all	4	4	4	1	4	1	4	1	4	4	4	1	4	4	4	1	4	1	4	1	1	1	4	4	4	4	1	4	4	4	4	4	1	1	1	1	4	1	1	4	1	1
33	FEMALE	Moderately	Moderately	Moderately	Moderately	Moderately	Moderately	3	6	4	3	3	3	4	3	3	3	3	3	3	3	3	3	3	3	3	3	4	3	3	4	3	3	3	3	3	4	3	3	3	3	3	3	3	3	3	6	3	6
25	FEMALE	Slightly	Slightly	Slightly	Slightly	Moderately	Not at all	1	1	1	1	1	4	1	4	4	3	4	4	3	4	4	4	3	4	4	4	4	4	4	1	4	4	4	3	4	4	4	3	4	1	4	4	4	3	3	4	4	4
39	FEMALE	Not at all	Not at all	Not at all	Not at all	Extremely	Not at all	4	5	5	5	3	5	5	5	5	5	3	5	5	3	1	5	5	5	5	5	5	5	5	5	5	5	5	5	5	5	3	5	3	5	5	5	5	5	2	2	1	5
33	FEMALE	Moderately	Not at all	Moderately	Moderately	Slightly	Moderately	2	1	1	2	4	4	1	4	1	4	1	4	1	2	4	1	4	2	1	1	2	1	4	6	3	1	1	4	1	4	2	1	1	4	2	4	1	3	1	4	1	4
23	FEMALE	Not at all	Not at all	Not at all	Not at all	Not at all	Not at all	4	3	4	4	4	4	4	4	4	4	4	4	4	4	4	4	4	4	3	4	4	4	4	4	4	4	3	2	4	3	6	5	6	4	3	6	1	3	4	1	3	4
20	MALE	Not at all	Not at all	Not at all	Not at all	Slightly	Not at all	6	3	3	3	4	1	6	3	4	3	4	3	4	6	4	6	4	1	1	3	3	1	3	3	4	3	4	1	6	1	6	1	4	3	1	3	4	3	4	6	3	3
19	MALE	Slightly	Not at all	Not at all	Not at all	Extremely	Slightly	2	4	3	5	5	5	4	3	3	2	4	2	4	4	4	3	6	4	4	5	5	5	3	3	3	5	5	5	5	5	3	5	5	5	5	3	4	2	5	1	2	2
27	FEMALE	Moderately	Slightly	Not at all	Not at all	Extremely	Slightly	3	3	3	3	6	2	6	2	1	1	1	4	4	2	2	1	1	6	1	3	4	4	1	3	1	1	2	1	1	1	1	2	2	2	2	2	2	2	2	2	2	3
33	MALE	Slightly	Slightly	Slightly	Not at all	Extremely	Not at all	2	2	2	2	2	2	2	4	4	1	2	2	2	1	2	2	3	1	2	2	4	1	2	2	1	2	2	2	2	2	1	2	2	4	1	1	2	2	2	1	1	3
25	MALE	Moderately	Not at all	Moderately	Moderately	Not at all	Not at all	2	3	3	3	3	6	4	3	4	4	6	6	5	6	6	6	6	4	4	3	6	2	2	1	1	1	1	1	1	1	1	2	2	2	2	2	1	1	1	5	1	2
24	FEMALE	Slightly	Not at all	Not at all	Not at all	Extremely	Not at all	2	2	2	2	4	2	1	2	3	2	1	1	1	2	1	2	1	2	2	2	2	4	2	1	4	1	2	2	1	1	2	2	2	2	2	2	4	4	4	2	1	2
25	FEMALE	Slightly	Not at all	Not at all	Not at all	Slightly	Not at all	1	3	5	3	5	2	2	5	5	5	2	4	4	4	2	5	3	3	4	6	4	4	2	3	6	6	1	3	1	1	2	2	2	4	2	5	5	6	3	3	2	2
36	MALE	Slightly	Slightly	Moderately	Moderately	Moderately	Moderately	2	2	2	2	2	4	5	5	1	5	4	5	5	1	1	6	2	2	2	4	4	2	2	2	2	2	2	2	2	3	2	2	2	2	2	3	2	2	2	2	5	5
33	FEMALE	Moderately	Not at all	Extremely	Moderately	Extremely	Not at all	1	1	4	1	1	2	2	1	2	1	1	2	2	1	2	1	2	2	2	2	2	2	2	2	2	2	2	2	1	2	2	2	1	2	1	2	2	2	2	2	2	6
36	FEMALE	Not at all	Not at all	Not at all	Not at all	Moderately	Not at all	6	6	6	3	5	2	2	4	4	5	1	2	3	6	6	3	3	6	1	1	2	6	5	5	6	1	3	4	4	1	3	2	1	1	1	5	5	2	6	2	2	2
33	MALE	Not at all	Slightly	Not at all	Moderately	Extremely	Not at all	3	4	1	4	3	6	4	3	1	3	3	3	3	6	4	3	3	6	1	4	4	4	3	3	6	1	3	1	3	4	1	3	4	3	3	3	4	4	4	3	1	3
33	MALE	Not at all	Not at all	Moderately	Moderately	Not at all	Not at all	4	3	3	1	1	6	3	5	2	4	2	3	1	4	1	6	3	1	4	2	6	6	4	4	2	1	1	3	4	1	3	4	4	3	4	4	6	3	4	3	4	4
28	MALE	Not at all	Not at all	Not at all	Not at all	Not at all	Not at all	3	4	6	5	3	1	3	3	3	6	6	5	6	3	2	1	2	1	4	3	3	6	3	3	4	2	3	3	3	6	3	3	4	2	3	1	5	3	3	3	6	5
20	FEMALE	Moderately	Not at all	Not at all	Slightly	Slightly	Slightly	4	4	6	4	1	6	3	4	1	3	4	4	1	2	3	2	1	4	6	3	3	4	1	4	6	4	3	1	2	3	3	1	4	3	4	4	4	6	1	3	4	4
39	FEMALE	Not at all	Not at all	Not at all	Slightly	Moderately	Not at all	3	3	3	3	6	2	6	2	1	1	1	4	4	2	2	1	1	6	1	3	4	4	1	3	1	1	2	1	1	1	1	2	2	2	2	2	2	2	2	2	2	3
33	FEMALE	Not at all	Slightly	Not at all	Not at all	Moderately	Not at all	5	5	5	5	5	5	5	5	5	5	5	5	5	5	5	5	5	5	5	5	5	5	2	4	5	5	2	2	1	1	1	1	2	2	2	5	5	5	5	5	5	5
19	FEMALE	Slightly	Extremely	Moderately	Slightly	Moderately	Not at all	4	4	2	2	4	1	2	2	2	4	1	4	3	3	1	2	5	4	2	4	3	2	2	2	2	2	2	4	3	1	2	5	3	2	2	4	2	2	2	2	2	2
20	FEMALE	Not at all	Not at all	Slightly	Moderately	Moderately	Slightly	2	3	3	3	2	2	4	3	2	6	4	4	4	4	4	4	4	4	4	4	4	4	4	4	4	4	4	4	4	4	4	4	4	4	4	4	4	4	4	4	4	4
29	MALE	Not at all	Not at all	Moderately	Not at all	Slightly	Not at all	6	6	5	6	6	6	6	6	4	6	4	3	3	3	3	6	3	3	3	3	6	5	6	4	4	3	3	1	6	3	3	3	4	3	5	3	4	3	4	3	3	3
24	MALE	Not at all	Not at all	Not at all	Not at all	Extremely	Not at all	5	5	5	5	5	5	5	5	5	5	5	5	5	5	5	5	5	5	5	5	5	5	5	5	5	5	5	5	6	3	6	5	5	5	5	5	5	5	5	5	5	5
[truncated: 33 more columns]
